# Supplementary material for: ABC Transporters in Prorocentrum lima and Their Expression Under Different Environmental Conditions Including Okadaic Acid Production
Source: PubMed Central journal article supplement (PMC6563122; doi:10.3390/md17050259), 2019-04-30
Supplement: marinedrugs-17-00259-s001.pdf [file marinedrugs-17-00259-s001.pdf]

**Supplementary Table 1** Subcellular localization of proteins predicted using CELLO (Yu et al, 2014), targetP v1.1 (Emanuelsson et al., 2000), ProtComp 9.0 and Euk-mPLOC 2.0 (Chou and Chen, 2010)

| Gene Name | CELLO          | targetP v1.1 | ProtComp 9.0    | Euk-mPLOC 2.0 |
|-----------|----------------|--------------|-----------------|---------------|
| ABCB1     | PlasmaMembrane | other *      | Plasma membrane | Cell membrane |
| ABCC1     | PlasmaMembrane | other *      | Plasma membrane | Cell membrane |
| ABCG2     | PlasmaMembrane | other *      | Plasma membrane | Cell membrane |

\* mean the proteins are non-chloroplast, non-mitochondrial and non-secretory protein.

1 10 20 30 40 50 60  
 P.lima MAMSAATPVEVDNMELEEIAGEADMEKAETDDERRQRQKEENEKLLKTEYNGPPLRKLKLSRME  
 Tetraselmis .....MAKGNADHEKVPK.....AVGYHKLYRYATPTD  
 F.solaris .....MAVKDTSVETSSQGESKGRKSPPPQ.....ASVSETLRFVFCGLST  
 S.microadriaticum MASNQAD...DADDEMVAEAKVETEVEVOTKKNIP.....AASLCKLEFSMDFVVE  
 70 80 90 100 110 120  
 P.lima ILIFAVGCLAAVAHGLSDPLICFLDGLDIDATAGDAG.....LSAFDNNVSKVVRFCWV  
 Tetraselmis GLLIALGTLGGIAHGATLPLWALLFGDVIINTFGAVGS.....DFMEKVRRSISLAFMYL  
 F.solaris QLLFVAGCAIAGVANGMVPALAYLFSSSFSDISAASN.....DGLAQRVRELAFTFMIV  
 S.microadriaticum VVLLVGCGLGALGNGLSPLLCIVFGDLIDGMGEATGGAESFTPFOMLGAMDGMSSQMEELCITMMLV  
 130 140 150 160 170 180 190  
 P.lima GVGIVVAGTIGQEFVCFYFTDVEASKIRFLYFKALLYRDVGVWFDTHDVGAALPTEIEELETYKDGIGP  
 Tetraselmis AVGSFVVSYLQMGWMLVGSQAARARIRFLLSALNODHSFYDSTASTGALLNRMEDCVTIETAMGE  
 F.solaris GTYALVASSLQGWCFEICAYRGCNFRKWFKALLRODAAYFDVHDVAATANAVGPASNKFRRGICR  
 S.microadriaticum GVGATFAAFVLOGACEKIFAEKQAFKRYLYDFDVLHQDSSWFDTKVVALPAELINDLEKIQDAFGD  
 200 210 220 230 240 250  
 P.lima KLGSSITMAVSTLFFGYAFALYLSWQVALVMTAVLPCMATGAAIMSGAAKDIQOERQAYGRATLIDE  
 Tetraselmis KAGTFVFNVSFFSGIGIALAYGWDLLVLVLAAMPLVGGSMALLFKVMGDSRRKSAAYSEANSIAQS  
 F.solaris KFGEGIQFLOCTGIFGLAYAFYSSWRVALVLCVIPFVCAAMAVMTFNQKGTSAEAYSRAVSAYT  
 S.microadriaticum KFGNGMMAISAFMGGFCGAFGMGWLILVLMCSILPFMVGAAFGKAVQETONESWAYRASAVVEE  
 260 270 280 290 300 310 320  
 P.lima VLFVAVRTVVSFGGEGHRELRGRYRAGVEEARRGIRARAAMGVGLCYIQCVFVLSYALAFWFGMLVY..  
 Tetraselmis ALSAVRTVYSFN.....AEAAATQAAERMVGRQSAAVGLCLCAFQLFMFCAYALALWYAAGRIR..  
 F.solaris TVSSIRTVLSLNAIPSFIRQVEATSQAQRMSTSMFLKTLGLANGSMGSLCLYAILSLYGTALFYRD  
 S.microadriaticum CLNAMRTVVAFGGEGHRELRKFSAAALVETRRGVKNGFKVYAGMYTMMIIFLGYGLAFWFGMLRYNE  
 330 340 350 360 370 380 390 400  
 P.lima .....GGA DLSAGK LQAFFCVILAGLT VGNIPFG LAALAA ARGSMARFFYLEHQG.  
 Tetraselmis .....SGEYDGGTVMTVFFSALIGGFSIGQANPCIVAFQNGRIAGARLFAVIDRAP.  
 F.solaris IDDTGCDPSAGVAGAVSCDSTGPEVFGSMLGVFAAQVVSQFNGFSEAFQARVAVYEALQTNRLP.  
 S.microadriaticum ELNP.....ATGKLWEPGTILMAIFFCIFI GSFMI GNLDPSLKA MKAQAQTAA GFFRALENKPE.  
 410 420 430 440 450 460 470  
 P.lima .....ETQKHLADEGEPCAPTETLELRDVEEFA  
 Tetraselmis .....SIDLHKGG.RTIEAVAGEVSLRQVEEFA  
 F.solaris APEKIFKPKDDALSMTTRSASNKSSEVEQVLKAILPKYQIDSTATTGFKPESLAGSINVKDVEEEN  
 S.microadriaticum .....DIQCRVEDKRQDISSTIEKEFEENVHEET  
 480 490 500 510 520 530  
 P.lima YFAREQCKVLDGVSFLLTKKGVAVVGGSGSGKSTVMALHEREYDPAACVVLVNDVLRQLSITASYRA  
 Tetraselmis YPSRPEAKVLDGVSLTARAGQVALVGGSGSGKSTIISLWERYVDPLAGSVLDGVP LCELDLKWLRSA  
 F.solaris YPTRRQDPI LNMNVEIAAGQTVAFVGGSGSGKSTIVSLHEREYDPLSGVIELDGKDLKEYNVTHLR  
 S.microadriaticum YFAREQCKVLDGVSLTARAGQVALVGGSGSGKSTVMALHEREYDPAACVVLVNDVLRQLSITASYRA  
 540 550 560 570 580 590 600  
 P.lima HVGTVGQEPVLFATSVKDNIMOGCPSATMKDVERVAREANLDFTDRLPQKFNFTVGS GGSOFGSGGQK  
 Tetraselmis QIGVVSQEPALFATTIYENIAYGRPGATEAEVRRAAQANADSFLELPSGGETTVGEGGVOISGGQK  
 F.solaris MIGVVSQEPVLFATTIRGNIRYGNPDAEDQVEEAARMANAHDFSAFTDGYDTVGGDKGSGSGLSGGQK  
 S.microadriaticum CHGVVQEPVLFASSIRHNIMOGNPSAKEDVVKACNDALIGFDVNDLPEKYNFTVGS GGSOFGSGGQK  
 610 620 630 640 650 660 670 680 690 700  
 P.lima QRITARALLKAPSVLFLDEATSALDNTSERMTQDITDSTGASSELGMTIIVIAHRLSTVKNADVITFV  
 Tetraselmis QRVAIARAVLKDPKVLLLDEATSALDAESERLVQGALERLMAG...RTITIVIAHRLTTRIRGAQHIQV  
 F.solaris QRITARAVLVGNPRHLLDEATSALDAESLVVQDALSILQKKK..ITITIIIAHRLSTIRNADKIIVV  
 S.microadriaticum QRITARALLKAPSVLFLDEATSALDNTSEKMTQATIDSTISANTADGLGIVSIAHRLSTVRSNDSLIVV  
 710 720 730 740 750 760 770 780 790 800  
 P.lima MKEG...KVAEQGTHAELAAAPGGIYRFAFAAQALS.....IEEPREEA  
 Tetraselmis MQQG...KLVEGSHAELLAKPHGAYALIAVQEAASGSRETQMPSAIQGDALVPSFPVDDAAQAE  
 F.solaris IQGCKVKPKLLI LDEATSALDNESEAIVQAAIDKLMERSQSTVIVIAHRLSTIRNADTIAYIDGAKVYL  
 S.microadriaticum MSRG...TLVEHGNHASLMEKKG..IYALVAAOES.....HKADEDEEK  
 810 820 830 840 850 860 870 880  
 P.lima VELERQATGPIQEAQATVSKKSTQRSTCSTIEEEREQOQREKETSASQYKVP.....MARL  
 Tetraselmis RAVEAQAKPPAEKPAAGSGRETRSWLRCLSAKAKQVPSADEEMALDADKPREPDAGGQAGPKLGRLL  
 F.solaris EQGSHDELISRPHGLYKRLFDSSRMKSNLTLNGSKADGDTSTEVEEEINWSEIEKEQASAFDARA  
 S.microadriaticum DAAATSNDHTAQNVVRSSTNSGSESTQTRVCKREKD.AEANREKETSASQYKVP.....MARL  
 890 900 910 920 930 940 950  
 P.lima LGFCRPEWAFVPGIVGAVISGAYPLMAVYALVEATLAFVLYTAPSDRE.....  
 Tetraselmis MALNAREWHLMVLGVI GSAGICATMPAFVALSSIIVVFFS...PDLD.....  
 F.solaris RRLASPDAFFIMGSGAVLAGGVFPANGVIFSETIDLFRVREVC PDANGDVIDGFGSCQDYWKSVA  
 S.microadriaticum LSYNREWPPFFLPAIIGAVVDSAMPVCTIALVGSMSGEFK...PDKE.....  
 960 970 980 990  
 P.lima LLREEVEKACTL FVIFAAK FVGTALQYVSFAILGESITKRCRVAML TATFRQETGFHD DPEHTPAR  
 Tetraselmis EQKQKADMWCLIFVAVGLSVFVCSLEQFSFGVMGARLATRVRVMLFGAMLRQEVGWRDRDENNSGA  
 F.solaris DEIQDGSFKVSVYWLCLLIGCLIGNIVVFWFGHASERLSKRVRDSAFATAI IRQDVAFDK..RSIGR  
 S.microadriaticum EMRADLELWALFRVTVIGSAFVIGTSVSHGCFSELGEMTORLRVAILTGMFRQEVGWRDHPANTPGM  
 1000 1010 1020 1030 1040 1050  
 P.lima LLOGTQVNAFRIS.TLCITFGDKADATASIGVGVVLAFTAQWOMALIMLASIPFIYALSTAFQLIVEGG  
 Tetraselmis LTIMTGTDAAHIRGAVGDTFGIIAQNLF TLGAGFVIAFLNDWRMTLVIIA AVPLIVVAGIQA KLLQE  
 F.solaris VTSELDQDAARIQAFCEPIRQLIVALS SVLTCVTVISLVFMWQFALLAICVPPMGFATS IEMKTFILG  
 S.microadriaticum LSKATLWALFRVTVIGSAFVIGTSVSHGCFSELGEMTORLRVAILTGMFRQEVGWRDHPANTPGM  
 1060 1070 1080 1090 1100  
 P.lima S...KVEESRALKQATQVVSDSL TGVRSVHAAGNERDVLKLFSTLVQRDQGNLAKLQCGIGYGSF  
 Tetraselmis SP...ESVTTKEAANADQVAEEAFQNIIRIVQAFNLQEGVTSLWEKYSAADARGKSRRAHVTVGLGFS  
 F.solaris EDIGNVNADELNSPGGIVVETLLNIRVVSALCLENARYENYKQALLNAEPNHRDFAFMGCTMAGLSM  
 S.microadriaticum A...SKNENITNANQIVVDSVMNARTVQALGVEKGLVGMYSVWEKSLVGMWRNII LACLGFGISN



```

1      10
P.lima      .MMEFESPCARAAAP.....
C.merolae  MDTQFGQNGEGAADREGVQETAARHGADASASRSAQPEWFPYSGQPAESVHEAQSPVPDDEFAEQLDI
F.solaris  .MTSYGSIQGNMSP.....
S.microadriaticum .MMAEAAENDRFTNYYVYDDELFNDRKRNRLGLDGMKVCLALLDADQGSGETISP.....DRFKA

...
P.lima      ...LRLRGE...VQRVPLDLDVGNAA...PG
C.merolae  AVAETAEQNDLTLGRERMSLVRHEVLSTPLAAEEDPNVDGVPRTAVQEAQADGIGIDPASQEKHPK
F.solaris  SNTDPHETTPLVNGR...SDSNIIEHVST...
S.microadriaticum .AYCPVKAEEKWLTKMKKTYGKNAECPMFERSGSESGAPQQAAPAAV...PG

40
P.lima      SAAAAAE...AATSPMPF...T
C.merolae  HAADALESQSTSAIATAGSAYFYQYQGRQAGVTDYHRYAQDQMRRIAEAAALATGDSASRKPLPELE
F.solaris  .OTETA...
S.microadriaticum .OTETA...EVLHQITLLGNDKNHKKTAAS

50      60      70      80      90      100
P.lima      GGLVSRLLFFFTWTFQLLKQAADTKLLEPSDFLALPAGSEPPQLYDSFTEAWRR...AAAAVAR
C.merolae  ASWLSRW..TFWFGSLIWRG...WRRLLDDSDLYELAPDDRAQPLSERFAVAWVDFLERQEERITR
F.solaris  GGYSKLLTFHWFTPLVLRGNEKLLDQDDLLALVPLLNDCTDYVTTTFDKYWEELQKECPSSLVN
S.microadriaticum .IGAWTDADEAFQTLILAARHDLDMIKYAHTPQSEFELPAGRKVFLLTATCNHKAAGLSPTEESFAV

110     120     130     140     150
P.lima      GPPFGA.GAGTHA...ASVLKTLWRV.LIAKLLVWVWGRGAQTLLKF...
C.merolae  ELERER.QARTAKTGALDGVAPRKDDSLDHVDEEQRLRQRSRWPMFWVILRVHTRIIIVSGILKFF
F.solaris  ALVRSF.GA...EYLEGAALKL...VHDLCLF...
S.microadriaticum .QLRHGRISHGAFALRNAGGQNGRAKLGYLMAVERNEPAAGGLVA...VKKLRLRVAGFEGIT

160     170     180     190     200
P.lima      ...AFPYCLNSLVNYYNDEREP.LWSGLRPALLLFIQVVALTLVTNHMDCWTTVIGLRTSRM..L
C.merolae  DVGLGQVSPVFLNKLLIWLTEPGAPTYQGYLWVLAIFLAPFLKAFVENQYFYTLFRLAVRIRGE..V
F.solaris  ...VGPQVLSHMIVFLRDPDAPLLWGLWIFAVTISQLAMSICLRHYFYKCYTTRLRTRTA..I
S.microadriaticum .RVC...TGESCLHRRVADSEKRRARR...VRVFGHCLRGF..DFYLWSDRPEKLNSTEDKN

220     230     240     250
P.lima      ISAVFHKVCRLRLDTLAEFSSGRLLNIIIT...TVDVAVRTLPLNHLQVLLT
C.merolae  QSAYVDKSLRLLSASARAQTTTGEVWNHMQ...LDAQRLSDFMQYAH.VLWA
F.solaris  VMAYVRKALLLSPEERQSRSMGEITNLAS...IDAQRLLQDITTYLN.AVWS
S.microadriaticum .IGAGISRPOVLRPTAVSGKSGMKAEMLQGRGLGVREWLNVAGGVACNONPLOLQAMFLSNVLLATWI

260     270     280     290     300     310     320
P.lima      MPTLTIATALFSLYKTLGIAGLIGVFWMSVVIILLNPLLVRLSRKLSARQAKTDERVRRVGETIAAT
C.merolae  ALLQGGALALLIVYLGYSGLIG.FLAAVLTVPLOGLYLVKRLSGFRRLTFGITDRVRKLLNEMFQGI
F.solaris  SPLOIGLALFFLWRQLGPSLGG.VS.VIIIMIPVTKYIATWMGTMQANLMKAKDERVELNAEVLGGM
S.microadriaticum .REAGQGPAFDDQSSYL.LASLAFALCAFRVSAAMYETKISRHLHOKMLASVLRQPLNWDYDTPPLG

330     340     350     360     370     380
P.lima      QIIRCAYEWEAAAEKVRQARQELQYH..WVLKVVYGSMAIWSQSTVPIATMFTFASYTWLNPPDR
C.merolae  KTLKIFYAWEPPFAVKVTEIREQELAAAYRRTVFVTRILEYVW..LFV.TPVLVSAVTFGFYGGVFH.NQ
F.solaris  KVIKFQAEESFQKRIQTEREALQLLR.YFLGTSESRM..LWVFTPLLVALATFSAY..VWSGHK
S.microadriaticum .RVLNRF.S.QDISLMDLQMPRLREFAMQ..HFAVVFVGLIGASVLAWPALLVLLLIG...WPLRR

390     400     410     420     430
P.lima      LTAATAFTAMSLGLLQAPTFMIFGVTQIVGASISGKRIG...QLLQLE...
C.merolae  LNPAFIFAGLSVLNLLRFPLIQYFVFTALVDARIGVORLQ...RFFALEEIEPSPATER
F.solaris  LDVASALTALSLFDLLRFPLMPLQINSIIEAAVSIDRLR...GFFISE...
S.microadriaticum .LQDRYVGSVALNLQRLM...LMAITSPVMSQVSGFLLAMDTIRAFRRERHFVVKRFFETMD...

P.lima      LSTDAKSSSSSSDLMGDPAQLKLDKQKRTPSAEDAQVPPAPHQPESTRSRWRFWRKPVRAAKHSA
C.merolae  .....
F.solaris  .....
S.microadriaticum .....GYYKTYWIHAVDRDLAMGLQ

440     450
P.lima      PSSEHPTDAIDGADASGSVMTRAREPSGAIPAEASSLPALHWGSPANLPAVAGVSGLSEQ..VEL
C.merolae  VG.....ININGVSAVYGSKNT...
F.solaris  IA.....VCVPFITLCLGASVM...LL
S.microadriaticum .....

460     470     480     490
P.lima      EPPREMGPPSSGSGLSID...FEAASFTWSLGRSGAEA...
C.merolae  MDSTDTAENGQGTGMLLD...KPSKDLSSGLGRASSSF...RKEPMYVIEIEHGCFDWTLSKEQP
F.solaris  .EGGTSRAGRKDTLEKD...KEVAILRALLSDAEQEI...QK...LQGEQP
S.microadriaticum .VYAGSLSPFELGLGLALTVGLAQRIPLYLWCWSTFEKFFGGAQRVAEYASLAWEGDKQDHDYWKQGL

500     510     520
P.lima      .AATDFEAGGQAEATADFM.....ADLTLKVRREGLLIV
C.merolae  APASASASATEGQQLPKRRLALFQRLWHRRELRRQPPQPEVRLKPVFEVPALEDVNLRIPPRALVAV
F.solaris  FSRQEPVIDQAGSSLCRR.....VNFKINQGEVIAI
S.microadriaticum .PVKSQGRAGGASPVALELREVFRLYQPLPLT...LQGLSLAVRPPGERVGI

530     540     550     560     570     580
P.lima      VGATASCKSLIHAVLGEPMQTSNLRGHAYVSRIQP...MGFVPOQPWIFNGTVRQNV.LFG
C.merolae  VGRVSGKSSLVSAIILGELQRRSGTVRVHG...S...VAYSAAAWIYNGTVRDNIL.LFG
F.solaris  VGSVSGKSSLINSILGELRLLTGKTEVKG...T...LAYFSQTPFIMNASVRDNI.LFG
S.microadriaticum .CGRTSGKSLFLACFRMVEAEGGEIHVVQSAKSLPLPELRASMAIVPODPLMFSSGIRSNLDLHG

590     600     610     620     630     640
P.lima      ...EPYDEQRYLECVRSCALQDFALLQAGDQTVVGEKGIALS GGQKARVSTARATYRAPSCGILLI
C.merolae  ...LPEYFKRYRRAIYVSAALNADLEILPAGDLTEICEKGINLSSGGQKQVSTARLVYA..NADVNIL
F.solaris  HVNPPDEDLYQRALDCCALRHDLSLLPDGDQTEICERGITLSSGGQKARVALARAVYH..RADITLV
S.microadriaticum ...QYSDAELLAALRLAHLLEEVHGMPPQKLDPEVQERGSNFSAGTVQLICARLLLA..KQRIVFL

```

650 660 670 680 690 700

P.lima DD PY SAL DAHV ARE V HD . TAV C . . . . . KL LRRR TR VVVTNRLE FLK . . GC DQ VLVLDA GRVE  
C.merolae DD PL SAL DAHV GDHV FQ . . KIL SNEH . . . . . GV LRKR TR VLVTNHL QYAS . . RCDW IWLME NGRIA  
F.solaris DD AL SAV DAHV AKHL FD . . RAI LDELMOPTIP G S MR . . SVVLVTNAL QYLNHP RINK IYVIE GRIV  
S.microadriaticum DE CT ASVD LKTD AQV QSAI RSA C . . . . . GDC . . AI LCI AHR LDT I I . . DY D LRAVLDS GRVI

P.lima ASGS YAE VCRSS RT . LTD LLAAGLQ . . . . . PGSD VED DSDPQSP E . . . . .  
C.merolae GQ TL QH LITSS PR . FVE MLAAM TA TR STQSKTQV GDNTEPAED DLHR LDAD DADGHR ERSESTKE  
F.solaris EEG YSS LSNNP DSV FAR ILSVI KDNK VSK . . . . . DLSET E D SSTEPK KTL . . . . .  
S.microadriaticum ETGS PSEL LQQQ GA . FTG LVASMGDAGAE IRRKLAASPPAPAPT EGCAMGRKAKRGTPD DLEPVPA

P.lima . . . . . SAPGSADVGDSSKDVASEQSPMSAEQAETRA SCNV E . . . . .  
C.merolae RTSFFSSSGVSGDP SVTGR ETQKSTDRGQLVVTET EINK . CHVA . . . . .  
F.solaris . . . . . TSTP SDNGHN LSTKKT KPSKLVSELRKTKIS . . . . .  
S.microadriaticum VPASAEA SAATA EPD S TLGSL LSTERRRP RWD DTPRL LCTGIVAGYLP GQPG EEDLEQAQPOLCPDR

P.lima . . . . . RDV VLY YVRHL G . GVFAV . . . . . ALVAAVS . . . . . LSE LFS LSLP  
C.merolae . . . . . LS VYG YAKRC G . NP YLF . . . . . IAILS F . . . . . VSGEAVVNN  
F.solaris . . . . . TEAY LNS WIHAS G . GF MIA . . . . . FFILVLF A . . . . . AGEVGF LSN  
S.microadriaticum QSQEV RDTPELQD SPISKLQRRYI NVAASVKG P GHYTMNPEK MOPCAKY SDRSRCD ICGKGERLFE .

P.lima I WLSK W I SNPVRDEEAF YLGT YVLSV C C V S M A A R D M V S M C V S L R A A A K L H A N M I T A V . . L R A P M T  
C.merolae W W L S F W S E H E Q Q Y T L G F F L G I Y F A L A G H A I I S F F R T Y W F L L L T I V A A R Y L H A E L L D S V . . L R A P M A  
F.solaris W W L T Y W S R H A D E A S Q F S F L S T Y A I I N L S A A L A G V F R M L F V A L V S L K A S R H L F D G L L N A V . . L F A P M S  
S.microadriaticum I F R A W E R S S O F A P H L R K L H R V I A Y F G K D C G R G L L G K R T S V I D L E R A K E L L E S S E S L R E Q I S S L N

P.lima FFQD TPQGRITNRF SKDINE IDVSLIFKV VYTLVPLNTVGNFAVVLVSAYFS AICFAPAALIYWRV  
C.merolae FYDV TPVGRILVRF SRDIMQIDFQLPQQYISFLQQIASIIAAYVFI AVIFPIFVAAMPITVLYFVL  
F.solaris FFD TPVGRILVRF SKDVI IDQLVQLTIRMLQTVFSILSTFVVISGVTPTFLVGLVPLCLFYISE  
S.microadriaticum ARDRAALHRAIVRISGQVEGTRINPELAAQAEQSFGRHLRAEDPFRALHRAIICYAISHRDLAVLVASHM

P.lima QKYI . . . . . NSGCT DIK . . . . . RIEK TSSSPVYNHFS SLCREN GISTV . . . . . R  
C.merolae QQIY . . . . . NPANI QFR . . . . . RLD SISKGP IYSHFSETL . NGLTTI . . . . . R  
F.solaris QRF . . . . . TLTYREIK . . . . . RLD SVLRSP IYALLGETI . DGVACI . . . . . R  
S.microadriaticum KRQHRWPEMGLLMKALQCL ELQEP LPSVQRMSRLELYECITVWT . AALPCLLEVELYDNGFPGAPK

P.lima AFHQVR . . . . . QCAI SNGLVAEQQR . . . . . PLYAETY  
C.merolae AYRQA . . . . . YQAVNRRFR IDINQR . . . . . AYHQVT  
F.solaris AFSAQK . . . . . S L T D R L K V M L D E Q Q H . . . . . A Y F L T C T  
S.microadriaticum I F K A A S Q P V Q E E P S S K K S R G K K K T K D K K A A A P E V Y S V T L I Y L S V V G E L H V E R S P R K P L A A K P L L E A A

P.lima VAAW . . . . . LAMRLDLLGFTLLLVSA LVFARG . . . . . HL  
C.merolae GNRW . . . . . LALRLEVLGLLVFITGIFGVTSK . . . . . NT  
F.solaris AQS . . . . . LARLELIGLTVITFATS AVVEHALFGA . . . . . DE  
S.microadriaticum L P G W S S G A E V V V V V V V V V V V V A V A A A V V V V V V V M A V V Q V S G E D V L S A L Q O T W P D C T S R R N V

P.lima ISTGSA . . . . . ALAL KMAN . . . . . DTSSMAGLVROLS . QFSGMGN CVERIKEIYVTE  
C.merolae TYVGLT . . . . . GLALTYAL . . . . . QVTSALSLAVRSIT . EVEQLMNSVERNFYITDS  
F.solaris TFAGLA . . . . . GLAISYAL . . . . . SVTQSLNWSVRMAS . DLANMVAVERVOEYSQI  
S.microadriaticum LQEGQTSVQAFCLGLAKAYFAPEMRLSRGTOVLP SLTKL LALFA RTIPGDPDFKYSTIQLNRRNYAR

P.lima LPAEAPAVVAEHRP PPGW . PSAGLLEVRNLWLYRPGYF . . FVLQGLS FETA PGE RIGIVGRTGAG  
C.merolae IPHEN . . LDGEEP PPSW . PQVGETV F E D V S L R Y R P Q L P . . . . . LVLQD V T F R V A G G E R V G I L G R T G S G  
F.solaris RHEELRNAELDEKLP PNW . PAHGEIVFKGAKLRYRPNLP . . . . . LVLKGLDLHIPSGSKIGVVGRGTGAG  
S.microadriaticum LHVDK . . . . . NNNGPSW IIALGXEYTGGLWLYDPHVP KEKECVKVKVEMP LRGYPLKVLV . GQMLPG

P.lima KSSLLALFRIVE PFS . . . . . GSTVLDGQDMLT MGLQDTRASLA IIPQEA IILFEGS . . . . .  
C.merolae KSSIIVALFRIVE IPVNETTGKPMGRILIDGLDISKLRVRSIRSLTIIPQDPVLFSGS . . . . .  
F.solaris KSTLMVALMRIVE LDE . . . . . GSISIDGDIRQIGLGIKIRRVAVIPQDPVLFSGT . . . . .  
S.microadriaticum RAHSIQNRWLRFDGRC . . . . . PHAALRFEGRMSLVYFSR . RGSSTILPEARQVLEGLHMLPLPTEA

P.lima . LRANCDPFSLYSDAEVWSALESAQISSVWNEQVAVQSREGGARLSHS . . . . . P L D L M L R  
C.merolae . IRLNLDPFGLYTD AELWSALRYAHLDD . . . . . AVHAMP GG . . . . . LEA QVA  
F.solaris . IRSNLDPFDFSEDLHTVLESVGLYKRTMEG . SMHSYSSLPLARVD . . . . . SIDTVV  
S.microadriaticum L I A G T S D A L P H S S E T P C T S A E D A D S D D D E F P D Y S A E A N G A G I L P R D F S E V L H A L E A A P A T D Q A V

P.lima EGGQ NLSA GQRQLVAMARAILRSLKLVVLD EATASL . . . . . DAA TD SAIQ QVVRRSFHGATLTIAHRLQ  
C.merolae EYGENLSAGQRQLICLARALLRHPRLISDEATSSV . . . . . DFQTDKVIQDVIRQQFEDATLLAIAHRLF  
F.solaris EGGNYSV GQRQLV IARALLGAKIVIDEATAV . . . . . DAETDAIQVRLVRFANATCLTVARHLN  
S.microadriaticum IGVASLGAGIAAPMSLHPLGFKTEVITAAEDTAIRLAKGFKVAKATKDV . DSFIIKKGKGLCEVRRHKQV

P.lima TIMDS DRV LVIQ . . . . . AGT . . . . . IAEI GPDPVLR . . . . . QKEGGC . . . . . FQSVMV  
C.merolae TLAAFDTC LVMH . . . . . HGR . . . . . VAEYGDPELLSTRPDGQFSRLVYSLGPRASAR . . . . . FRALLR  
F.solaris TIMDSDFI LVM . . . . . DGK . . . . . LAEFDKPDALV . . . . . RKGGL . . . . . FRDLVK  
S.microadriaticum EDLKP PREHIFHAVVDGAPLP LICYNEERGE STSKDTA AFRKIEAFLAE RRPCLALIEVPD FDDVLS

P.lima EAE R Q . . . . .  
C.merolae EHAPQRRHRQSSRKGRALSMTATSGSALEAEPDSVHPEIDP  
F.solaris AASHD . . . . .  
S.microadriaticum T L N R A I R A I D T C N F I R V L W S V C V E E V G E L G . . . . .

Supplementary Figure 2 Alignment of ABCC1 from *P. lima* with other algae (*Cyanidioschyzon merolae* strain 10D, *Fistulifera solaris*, and *Symbiodinium microadriaticum*) ABCC1/MRP1 transporter proteins.

*P. lima* .....  
*Tetraselmis* .....  
*F. solaris* MIDDSSAPRDESESESASTATPVIADATTAEGVFDIPSCMPAEALYNCDILTPEEYNAATNTGAQLIQL  
*S. microadriaticum* ..MNSLKFQPTLGEPCSLQLLDCERRACCSSKKLLPKFLLFPVGCALPRGRSSSCPVGVPAGLAVL

*P. lima* .....  
*Tetraselmis* .....  
*F. solaris* VSEMLRT.....VDESIRESENKGENLLSMNEGLSLSVADYQVATEVPPERP  
*S. microadriaticum* EGPSMDTDPEDTDPDPEEYSRFGWVPPRESRVSRGATGHDLGSAAGGSGSAPCIYGAASKPERAERP

*P. lima* .....M<sup>1</sup>AHEGPI  
*Tetraselmis* .....MLDEQNFTEVRRK  
*F. solaris* IQLAVKHAPQYCGLPSELADDSQRSSSSNSAASFRGFPDKFPESIR....ETLPPEADFFAIREGM  
*S. microadriaticum* AKCDVIQSPKIMEAAQKAGDRAVPEAACTVGARYSSAVESLCKDLEFVTGESGDVQLDPTL<sup>1</sup>AYGAA

*P. lima* AMEWQNLTYRLPPKRR..GEIG.RAVLKDAPFKCDPGLM<sup>1</sup>AILGASGSGKSSLNALAGR...MPY  
*Tetraselmis* VISWENLTYEIPAGGSCFGERKQKT<sup>1</sup>VLKNVSGVALPGLTAVMGPTGCGKSTLLNALAGR<sup>1</sup>LHKVGVV  
*F. solaris* TLAWKDVN..LTVKGR..GKILD<sup>1</sup>RRILQNVWGEVPPKETTAIMGSSGAGKSTLMNVLSGR...TAS  
*S. microadriaticum* ALTEFKDVSFEL<sup>1</sup>LPGRE...RIL<sup>1</sup>ILSPCSGHFEPGL<sup>1</sup>LV<sup>1</sup>ALMGPSGSGKSTLLDILAGK...KTSFY

*P. lima* IPKTEL<sup>1</sup>LAGSILIQAKGGTFYANTVDLPS<sup>1</sup>ISAYVE<sup>1</sup>QEDALF<sup>1</sup>ALS<sup>1</sup>TV<sup>1</sup>EBTL<sup>1</sup>RMFG<sup>1</sup>RFR...FPH<sup>1</sup>LREAE  
*Tetraselmis* SGEVLVNGA.....LRADDFYGY<sup>1</sup>SAYSL<sup>1</sup>QDDALF<sup>1</sup>GNLTVRET<sup>1</sup>FWVSHLR..LPAGT<sup>1</sup>SRQQ  
*F. solaris* GGNVQVKANITLDNVPAD..PTKIGVRO<sup>1</sup>MIAFVA<sup>1</sup>QDDSLQV<sup>1</sup>TATPREA<sup>1</sup>IRFSAKLR..LGRS<sup>1</sup>LTDDQ  
*S. microadriaticum* TGQVHLNGL.....PRNELFPR<sup>1</sup>LTSYV<sup>1</sup>QDDVME<sup>1</sup>P<sup>1</sup>TVT<sup>1</sup>VK<sup>1</sup>EQV<sup>1</sup>MFHTALK<sup>1</sup>TEVP<sup>1</sup>STVRRD

*P. lima* LMKRVNDVICVIGL<sup>1</sup>NPARN<sup>1</sup>TLVGS<sup>1</sup>DKPGQ<sup>1</sup>RGTS<sup>1</sup>SGGERKRV<sup>1</sup>H<sup>1</sup>LG<sup>1</sup>LELL<sup>1</sup>HK<sup>1</sup>PR<sup>1</sup>LIF<sup>1</sup>VDEPT<sup>1</sup>SGL<sup>1</sup>DSY<sup>1</sup>HA  
*Tetraselmis* RQSAVEELIKMNGLSGAAD<sup>1</sup>TYIGSSM..RRCVSGGERKRAAIA<sup>1</sup>VELISN<sup>1</sup>PCIL<sup>1</sup>FIDEPT<sup>1</sup>SGL<sup>1</sup>DSFQA  
*F. solaris* LDIMTQCLMHELGLVACAD<sup>1</sup>TIVGGPL..IKGSSGGERKRTSV<sup>1</sup>GVELV<sup>1</sup>VK<sup>1</sup>PMLE<sup>1</sup>FIDEPT<sup>1</sup>SGL<sup>1</sup>DSFSA  
*S. microadriaticum* WAKT<sup>1</sup>IELQLRAVGL<sup>1</sup>EEVQ<sup>1</sup>N<sup>1</sup>SLIGSDV..V<sup>1</sup>RGTS<sup>1</sup>SGGQRRRV<sup>1</sup>SLACGLA<sup>1</sup>TGA<sup>1</sup>QIE<sup>1</sup>FIDEPT<sup>1</sup>SGL<sup>1</sup>SATDA

*P. lima* LNVMATL<sup>1</sup>KDLAIS.GHTVVCS<sup>1</sup>IHQPRSS<sup>1</sup>IYQ<sup>1</sup>LIDK<sup>1</sup>LILMAE<sup>1</sup>QVAY<sup>1</sup>FGD<sup>1</sup>CGVAC<sup>1</sup>AKH<sup>1</sup>FAK<sup>1</sup>IGYAV<sup>1</sup>PQ  
*Tetraselmis* QSVLEAL<sup>1</sup>LRGLAEM.GRTVVIV<sup>1</sup>IHQPRSS<sup>1</sup>IFQ<sup>1</sup>MFDR<sup>1</sup>LCVLS<sup>1</sup>QGRALY<sup>1</sup>MGVAA.KSADH<sup>1</sup>FAQ<sup>1</sup>IGFPC<sup>1</sup>PQ  
*F. solaris* VQLCQL<sup>1</sup>LK<sup>1</sup>KVARV.GASVMFT<sup>1</sup>IHQPRSS<sup>1</sup>IFREED<sup>1</sup>Q<sup>1</sup>LILLN<sup>1</sup>KGRVMY<sup>1</sup>QGPVS.TIADY<sup>1</sup>FGAR<sup>1</sup>GHP<sup>1</sup>PP  
*S. microadriaticum* EQCVR<sup>1</sup>MR<sup>1</sup>LCKKY<sup>1</sup>GVSTVVA<sup>1</sup>IHQPR<sup>1</sup>QEVAV<sup>1</sup>LEDH<sup>1</sup>LLLL<sup>1</sup>TS<sup>1</sup>G<sup>1</sup>DV<sup>1</sup>VY<sup>1</sup>NG<sup>1</sup>KMT.EARRY<sup>1</sup>MSD<sup>1</sup>AGE<sup>1</sup>VPD

*P. lima* DFNPAD<sup>1</sup>HFLD<sup>1</sup>VTSVDF<sup>1</sup>RT<sup>1</sup>PA<sup>1</sup>QEA..KTRQ<sup>1</sup>TMEQV<sup>1</sup>I<sup>1</sup>ANCP<sup>1</sup>PLGSEL<sup>1</sup>M<sup>1</sup>TPKP<sup>1</sup>TGA...LLPPE<sup>1</sup>L<sup>1</sup>AGM  
*Tetraselmis* NFNTAD<sup>1</sup>FILDLV<sup>1</sup>SIDS<sup>1</sup>RTPE<sup>1</sup>SEA..NTAER<sup>1</sup>VEK<sup>1</sup>LARHFEE<sup>1</sup>QSRDK<sup>1</sup>MNNVE<sup>1</sup>VQVEQ<sup>1</sup>PASQ<sup>1</sup>PPP<sup>1</sup>KGR<sup>1</sup>SI  
*F. solaris* NYNPAD<sup>1</sup>WIMKVAQ...KVP<sup>1</sup>I<sup>1</sup>QEL...EEA<sup>1</sup>GFFPK<sup>1</sup>DERKAT<sup>1</sup>VTNE<sup>1</sup>VDT<sup>1</sup>SEL<sup>1</sup>LILRN<sup>1</sup>QS<sup>1</sup>IPQA  
*S. microadriaticum* LVSP<sup>1</sup>TDY<sup>1</sup>F<sup>1</sup>LDLVT<sup>1</sup>PGT<sup>1</sup>LDS<sup>1</sup>QV<sup>1</sup>DL<sup>1</sup>REFY<sup>1</sup>QTS<sup>1</sup>PKK<sup>1</sup>ASVDEL<sup>1</sup>VDRE<sup>1</sup>LCKAA<sup>1</sup>LTA<sup>1</sup>EEL<sup>1</sup>LEARHRR<sup>1</sup>LSQF

*P. lima* GRRHV.....PFGVAFG<sup>1</sup>MLLK<sup>1</sup>RTWREL<sup>1</sup>TRDKAAL<sup>1</sup>AIKYGA<sup>1</sup>NIWF<sup>1</sup>TIIFG<sup>1</sup>CVY<sup>1</sup>FQM...EKT<sup>1</sup>TQ  
*Tetraselmis* GTRRP.....GFFRQFG<sup>1</sup>VLFW<sup>1</sup>RSLR<sup>1</sup>Q<sup>1</sup>NARN<sup>1</sup>HNVPN<sup>1</sup>AIT<sup>1</sup>LV<sup>1</sup>QSVL<sup>1</sup>IAVLLGLIY<sup>1</sup>QDI...EMN<sup>1</sup>Q  
*F. solaris* KEKPP.....TMTTEIS<sup>1</sup>MLVW<sup>1</sup>RELV<sup>1</sup>HIRRAKSVT<sup>1</sup>VARI<sup>1</sup>I<sup>1</sup>Q<sup>1</sup>TIVL<sup>1</sup>SAVIGL<sup>1</sup>IFD<sup>1</sup>VGNAP<sup>1</sup>ND<sup>1</sup>SV  
*S. microadriaticum* GDM<sup>1</sup>PL<sup>1</sup>RS<sup>1</sup>HS<sup>1</sup>IYGVRE<sup>1</sup>QKQL<sup>1</sup>KV<sup>1</sup>F<sup>1</sup>QVRL<sup>1</sup>LLR<sup>1</sup>DQ<sup>1</sup>QG.VTE<sup>1</sup>ILL<sup>1</sup>AMV<sup>1</sup>QALVY<sup>1</sup>GAAY<sup>1</sup>IGL...GKGE

*P. lima* TGLQNRSG<sup>1</sup>ICFF<sup>1</sup>MAMN<sup>1</sup>QAFGS<sup>1</sup>TIG<sup>1</sup>VAKVI<sup>1</sup>PQQLK<sup>1</sup>VV<sup>1</sup>RE<sup>1</sup>RAAK<sup>1</sup>LYD<sup>1</sup>IFP<sup>1</sup>FYM.....ATF  
*Tetraselmis* TGIKDR<sup>1</sup>GLVLF<sup>1</sup>VINT<sup>1</sup>SMSAV<sup>1</sup>FT<sup>1</sup>IIQ<sup>1</sup>VFP<sup>1</sup>AEK<sup>1</sup>GIV<sup>1</sup>SRE<sup>1</sup>RDS<sup>1</sup>Q<sup>1</sup>TYS<sup>1</sup>VAA<sup>1</sup>YFA.....SKY  
*F. solaris* SNLQGH<sup>1</sup>FGA<sup>1</sup>IIMVAT<sup>1</sup>IIMM<sup>1</sup>GP<sup>1</sup>AQAALL<sup>1</sup>SF<sup>1</sup>PDER<sup>1</sup>PV<sup>1</sup>LRE<sup>1</sup>YST<sup>1</sup>KHYS<sup>1</sup>VSS<sup>1</sup>YFL.....SRL  
*S. microadriaticum* DAGYHOV<sup>1</sup>CFY<sup>1</sup>MLVMT<sup>1</sup>CALSG<sup>1</sup>IKD<sup>1</sup>VVST.REPG<sup>1</sup>PL<sup>1</sup>DS<sup>1</sup>EVPA<sup>1</sup>RWVE<sup>1</sup>FGL<sup>1</sup>YLL<sup>1</sup>RECSG<sup>1</sup>DSEGM<sup>1</sup>SEPS<sup>1</sup>F

*P. lima* ICQLP.....LELIP<sup>1</sup>QLI.....FGAAV<sup>1</sup>YT  
*Tetraselmis* ISEMP.....FKIFG<sup>1</sup>P<sup>1</sup>IV.....NGI<sup>1</sup>I<sup>1</sup>LYW  
*F. solaris* SIEAM.....MGAL<sup>1</sup>Q<sup>1</sup>SLL.....TTL<sup>1</sup>ICYF  
*S. microadriaticum* RVGLP<sup>1</sup>GALGDEDD<sup>1</sup>ELHEK<sup>1</sup>DSP<sup>1</sup>SKKARATHK<sup>1</sup>QSGEV<sup>1</sup>TMD<sup>1</sup>SLR<sup>1</sup>QLL<sup>1</sup>WEQA<sup>1</sup>QMLLD<sup>1</sup>AQKSS<sup>1</sup>TAQV<sup>1</sup>QHA

*P. lima* LTGLRPGIDYMTYVAVLML.....ENFAGIG<sup>1</sup>LGMVMSA<sup>1</sup>SF.TKVE<sup>1</sup>QVP...  
*Tetraselmis* AVGLNPAEAFFFL<sup>1</sup>LLLAT.....LGLCAA<sup>1</sup>IGLAVGAWC.PTQE<sup>1</sup>VTF...  
*F. solaris* AIDFR...GSFIN<sup>1</sup>YYGACFT.....LAMGSTA<sup>1</sup>IAVILGA<sup>1</sup>AAGSS<sup>1</sup>SIAT...  
*S. microadriaticum* LQDLEK<sup>1</sup>RQSQR<sup>1</sup>LDAVEAK<sup>1</sup>LQH<sup>1</sup>HDTKT<sup>1</sup>VGIEER<sup>1</sup>LLD<sup>1</sup>QDR<sup>1</sup>LSKVE<sup>1</sup>Q<sup>1</sup>QSAAGR<sup>1</sup>GPDR<sup>1</sup>RAT<sup>1</sup>LVFGG<sup>1</sup>WK

*P. lima* .QIAPLVIVFFL..MFSGLL<sup>1</sup>LN...QDD<sup>1</sup>IPS<sup>1</sup>IF<sup>1</sup>RP<sup>1</sup>LKH<sup>1</sup>V<sup>1</sup>SF<sup>1</sup>IR.....YAFQ<sup>1</sup>AL<sup>1</sup>TV<sup>1</sup>NEL<sup>1</sup>RGN  
*Tetraselmis* .AVAPLIMIVFM..LFGGFF<sup>1</sup>IK...VES<sup>1</sup>LPT<sup>1</sup>GSEW<sup>1</sup>VAY<sup>1</sup>LSP<sup>1</sup>ML.....WGFV<sup>1</sup>GV<sup>1</sup>TTND<sup>1</sup>LRGL  
*F. solaris* .AALPLVLLPQM..LFVGY<sup>1</sup>FVS...PEL<sup>1</sup>IP<sup>1</sup>VW<sup>1</sup>LRW<sup>1</sup>IY<sup>1</sup>IC<sup>1</sup>PMT.....YATR<sup>1</sup>ILL<sup>1</sup>VAE<sup>1</sup>FQ...  
*S. microadriaticum* NOTRKNVLLHQ<sup>1</sup>LNSAIT<sup>1</sup>GLN<sup>1</sup>LKDEF<sup>1</sup>DS<sup>1</sup>EPFT<sup>1</sup>GL<sup>1</sup>RRS<sup>1</sup>IALCN<sup>1</sup>FKKREG<sup>1</sup>EGEDG<sup>1</sup>CRTR<sup>1</sup>MLG<sup>1</sup>ILQA<sup>1</sup>INT

*P. lima* TGFE<sup>1</sup>C.....SGTG<sup>1</sup>LGRRC<sup>1</sup>LQGD<sup>1</sup>DWL.....D<sup>1</sup>.Q<sup>1</sup>LS<sup>1</sup>FGEVSI<sup>1</sup>QRSMKI<sup>1</sup>LF<sup>1</sup>L...  
*Tetraselmis* DGWE<sup>1</sup>CEPAASNTSSAPGEQ<sup>1</sup>EDCN<sup>1</sup>LVRECS<sup>1</sup>TIGE<sup>1</sup>NIL.....EKE<sup>1</sup>LD<sup>1</sup>FAKYTR<sup>1</sup>WEALMY<sup>1</sup>LV<sup>1</sup>LVG  
*F. solaris* ...T<sup>1</sup>C.....EES<sup>1</sup>FLSQ...IYQ<sup>1</sup>SLL.....DNT<sup>1</sup>GAD<sup>1</sup>PDEV<sup>1</sup>L...YWC<sup>1</sup>ILI  
*S. microadriaticum* AKVSM<sup>1</sup>DGADK<sup>1</sup>PLWCSFSRSP<sup>1</sup>EEGR<sup>1</sup>AALAA<sup>1</sup>L<sup>1</sup>VKK<sup>1</sup>SVM<sup>1</sup>RLCPGRGG<sup>1</sup>D<sup>1</sup>LEVE<sup>1</sup>FESSGMT<sup>1</sup>WIRED<sup>1</sup>QLSGM<sup>1</sup>G

*P. lima* .EILVFNLLAFR<sup>1</sup>TILNGKQ<sup>1</sup>PR<sup>1</sup>MKA<sup>1</sup>KANPN...AA<sup>1</sup>SKDML<sup>1</sup>IGA...  
*Tetraselmis* AGV<sup>1</sup>LVFGY<sup>1</sup>LGLV<sup>1</sup>VIGNRYQ<sup>1</sup>PLSQ<sup>1</sup>ERR<sup>1</sup>FRP...IL<sup>1</sup>SSRSR<sup>1</sup>VAAGRS  
*F. solaris* GQFV<sup>1</sup>FR<sup>1</sup>LIALAIL<sup>1</sup>HKSAQR<sup>1</sup>FY.....  
*S. microadriaticum* TAPREVRN<sup>1</sup>.PMEV<sup>1</sup>LTKAGK<sup>1</sup>G<sup>1</sup>WIDE<sup>1</sup>H<sup>1</sup>TLAKWCEVD<sup>1</sup>VA<sup>1</sup>AIREIA<sup>1</sup>SEHRF

Supplementary Figure 3 Alignment of ABCG2 from *P. lima* with other algae (*Tetraselmis* sp. GSL018, *Fistulifera solaris* and *Symbiodinium microadriaticum*) ABCG2 transporter proteins.

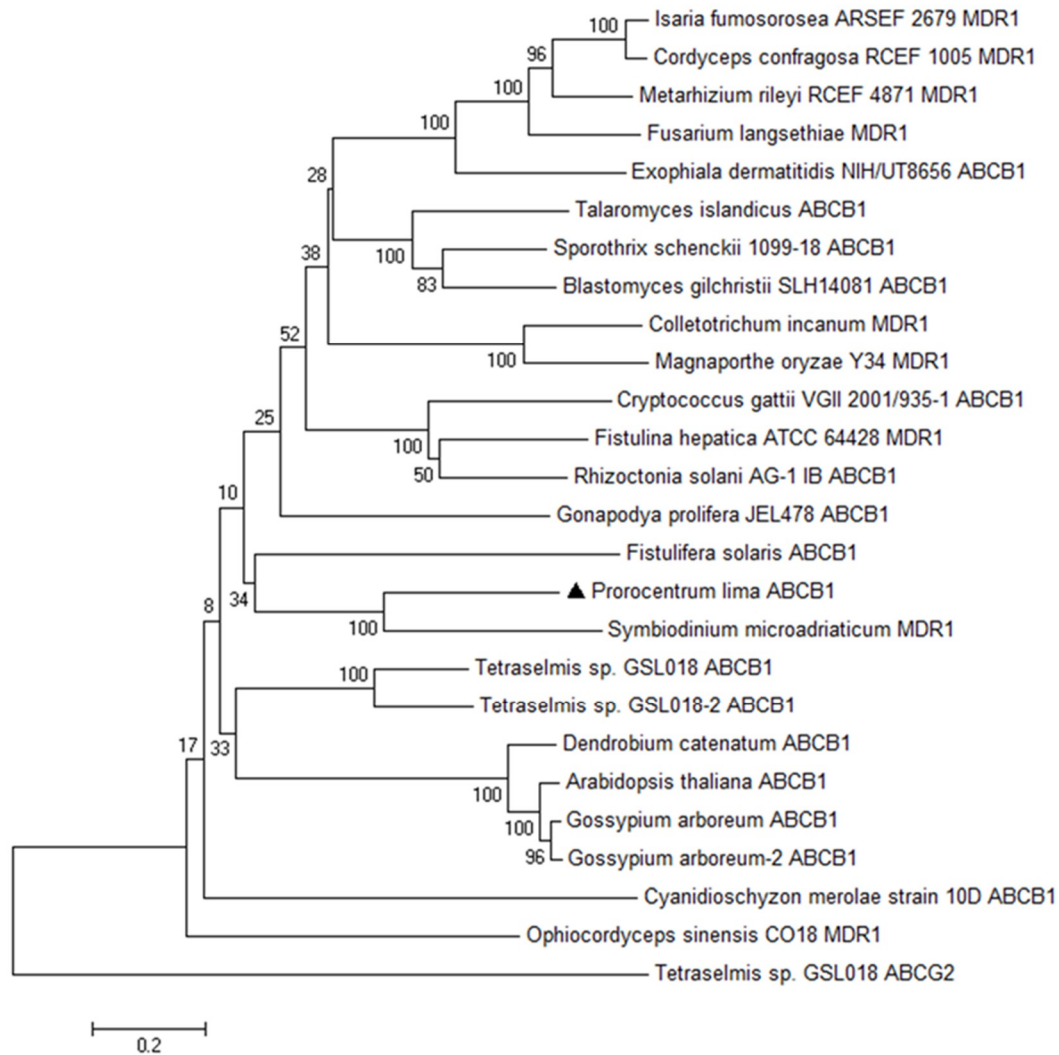

**Supplementary Figure 4** Phylogenetic tree based on multiple alignment (Clustal 3.0) of various ABCB1/MDR1 transporter amino acid sequences from various plants and algae. Tree was generated using the neighbor-joining method. Percent concordance shown at the nodes is based on 1000 bootstrap iterations. ABCB1 transporters are as follows: MDR1 (XP\_018701169.1) for *Isaria fumosorosea* ARSEF 2679; MDR1 (OAA74823.1) for *Cordyceps confragosa* RCEF 1005; MDR1 (OAA35161.1) for *Metarhizium rileyi* RCEF 4871; MDR1 (KPA41886.1) for *Fusarium langsethiae*; ABCB1 (EHY53853.1) for *Exophiala dermatitidis* NIH/UT8656; MDR1 (CRG91977.1) for *Talaromyces islandicus*; MDR1 (KJR80784.1) for *Sporothrix schenckii* 1099-18; MDR1 (OAT13273.1) for *Blastomyces gilchristii* SLH14081; MDR1 (KZL80199.1) for *Colletotrichum incanum*; MDR1 (ELQ42255.1) for *Magnaporthe oryzae* Y34; ABCB1 (KIS00281.1) for *Cryptococcus gattii* VGII 2001/935-1; MDR1 (KIY44784.1) for *Fistulina hepatica* ATCC 64428; ABCB1 (CEL54430.1) for *Rhizoctonia solani* AG-1 IB; ABCB1 (KXS15947.1) for *Gonapodya prolifera* JEL478; ABCB1 (GAX29293.1) for *Fistulifera solaris*; MDR1 (OLQ15128.1) for *Symbiodinium microadriaticum*; ABCB1 (JAC83958.1) for *Tetraselmis* sp. GSL018; ABCB1 (JAC73905.1) for *Tetraselmis* sp. GSL018-2; ABCB1 (XP\_020679153.1) for *Dendrobium catenatum*; ABCB1 (NP\_181228.1) for *Arabidopsis thaliana*; ABCB1 (KHG30028.1) for *Gossypium arboreum*; ABCB1 (KHG25987.1) for *Gossypium arboreum* -2; ABCB1 (XP\_005535498.1) for *Cyanidioschyzon merolae* strain 10D; MDR1 (EQL01639.1) for *Ophiocordyceps sinensis* CO18. ABCG2 (JAC83372.1) for *Tetraselmis* sp. GSL018.

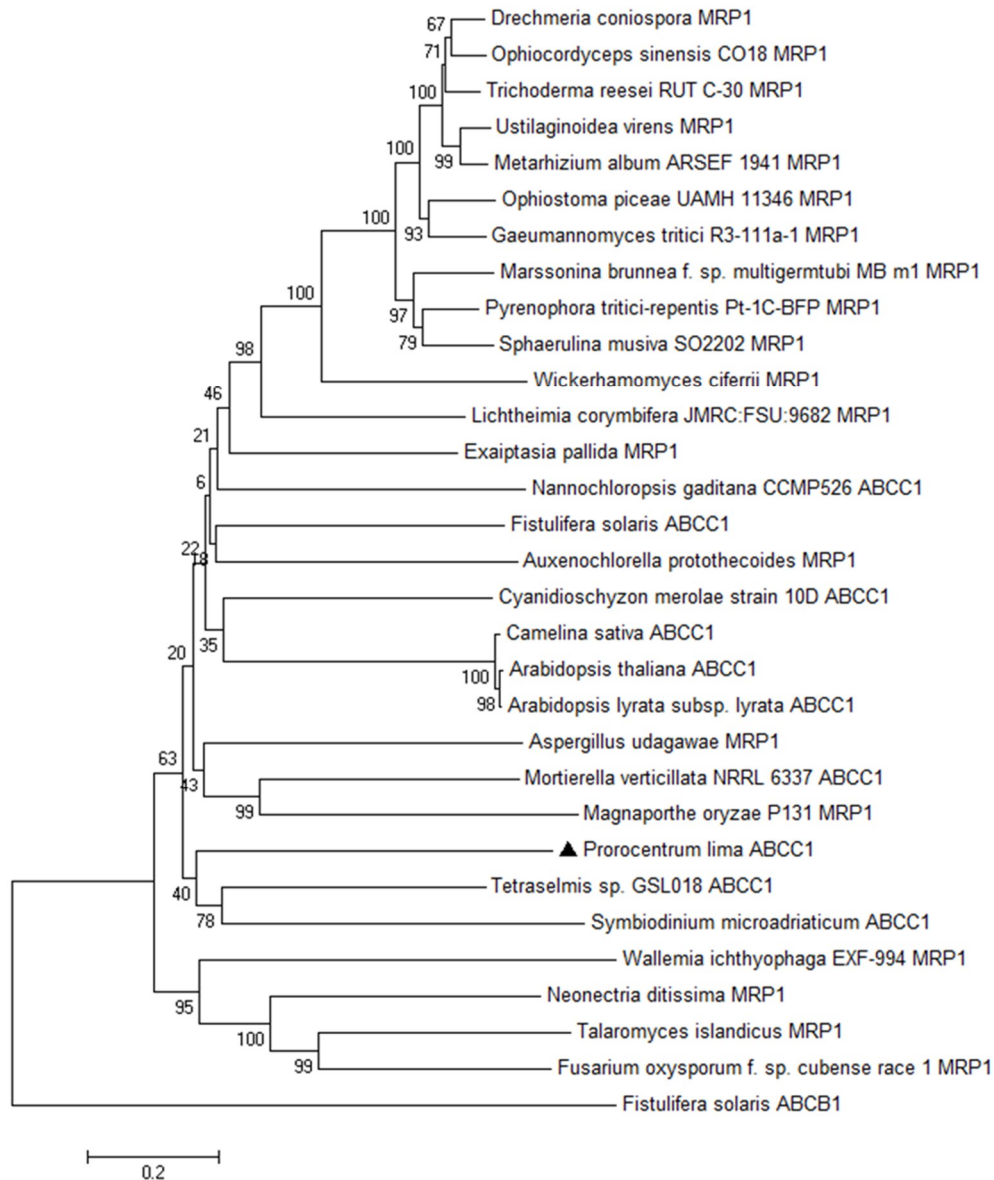

**Supplementary Figure 5** Phylogenetic tree based on multiple alignment (Clustal 3.0) of various ABCC1/MRP1 transporter amino acid sequences from various plants and algae. Tree was generated using the neighbor-joining method. Percent concordance shown at the nodes is based on 1000 bootstrap iterations. ABCC1 transporters are as follows: MRP1 (KYK61458.1) for *Drechmeria coniospora*; MRP1 (EQL01282.1) for *Ophiocordyceps sinensis* CO18; MRP1 (ETS00260.1) for *Trichoderma reesei* RUT C-30; MRP1 (KDB17864.1) for *Ustilaginoidea virens*; MRP1 (KHO00668.1) for *Metarhizium album* ARSEF 1941; MRP1 (EPE10310.1) for *Ophiostoma piceae* UAMH 11346; MRP1 (EJT81949.1) for *Gaeumannomyces tritici* R3-111a-1; MRP1 (EKD20282.1) for *Marssonina brunnea* f. sp. 'multigermtubi' MB\_m1; MRP1 (EDU40488.1) for *Pyrenophora tritici-repentis* Pt-1C-BFP; MRP1 (EMF11638.1) for *Sphaerulina musiva* SO2202; MRP1 (CCH41464.1) for *Wickerhamomyces ciferrii*; MRP1 (CDH53089.1) for *Lichtheimia corymbifera* JMRC:FSU:9682; MRP1 (XP\_020903336.1) for *Exaiptasia pallida*; ABCC1 (EKU20214.1) for *Nannochloropsis gaditana* CCMP526; ABCC1 (GAX21062.1) for *Fistulifera solaris*; MRP1 (KFM23846.1) for *Auxenochlorella protothecoides*; ABCC1 (XP\_005537371.1) for *Cyanidioschyzon merolae* strain 10D; ABCC1 (XP\_019094624.1) for *Camelina sativa*; MRP1 (NP\_001031116.1) for *Arabidopsis thaliana*; ABCC1 (XP\_020866423.1) for *Arabidopsis lyrata* subsp. *lyrata*; MRP1 (GAO82707.1) for *Aspergillus udagawae*; ABCC1 (KFH70890.1) for *Mortierella verticillata* NRRL 6337; MRP1 (ELQ66541.1) for *Magnaporthe oryzae* P131; ABCC1 (JAC66611.1) for *Tetraselmis* sp. GSL018; MRP1 (OLQ15328.1) for *Symbiodinium microadriaticum*; MRP1 (XP\_009270082.1) for *Wallemia ichthyophaga* EXF-994 ; MRP1 (KPM36182.1) for *Neonectria ditissima*; MRP1 (CRG89601.1) for *Talaromyces islandicus*; MRP1 (ENH68971.1) for *Fusarium oxysporum* f. sp. cubense race 1. ABCB1 (GAX29293.1) for *Fistulifera solaris*.



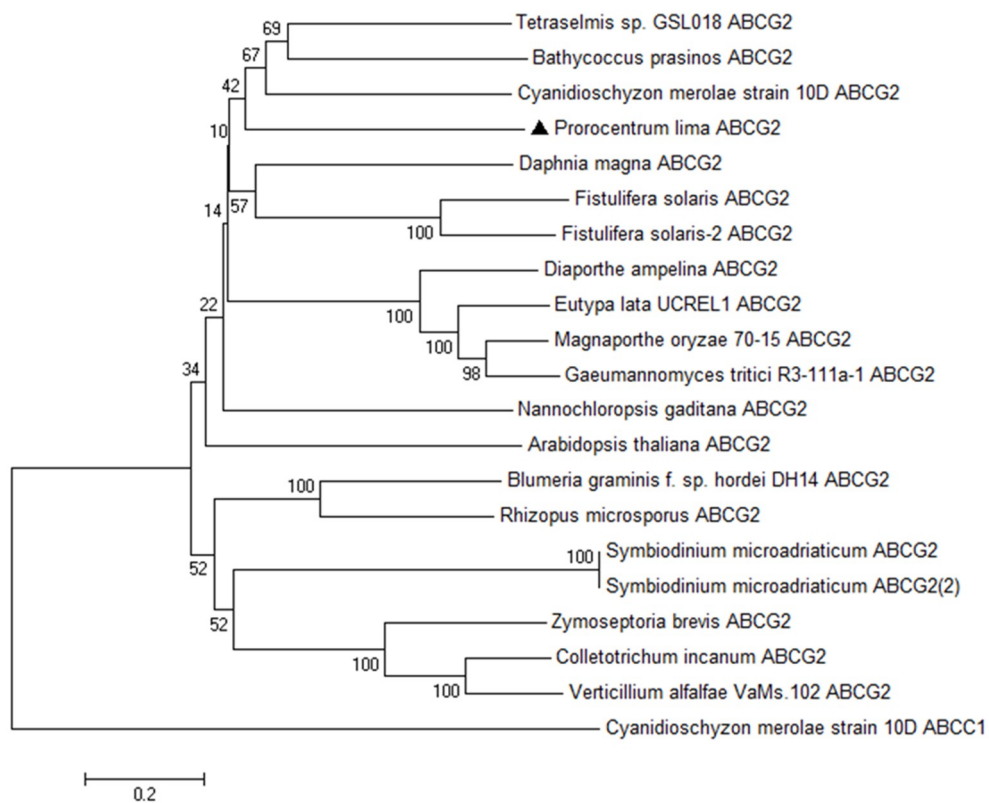

**Supplementary Figure 6** Phylogenetic tree based on multiple alignment (Clustal 3.0) of various ABCG2 transporter amino acid sequences from various plants and algae. Tree was generated using the neighbor-joining method. Percent concordance shown at the nodes is based on 1000 bootstrap iterations. ABCG2 transporters are as follows: ABCG2 (JAC83372.1) for *Tetraselmis* sp. GSL018; ABCG2 (XP\_007509928.1) for *Bathycoccus prasinos*; ABCG2 (BAM82508.1) for *Cyanidioschyzon merolae* strain 10D; ABCG2 (KZS09610.1) for *Daphnia magna*; ABCG2 (GAX11407.1) for *Fistulifera solaris*; ABCG2 (GAX12580.1) for *Fistulifera solaris-2*; ABCG2 (KKY38206.1) for *Diaporthe ampelina*; ABCG2 (EMR71650.1) for *Eutypa lata* UCREL1; ABCG2 (XP\_003713947.1) for *Magnaporthe oryzae* 70-15; ABCG2 (EJT81949.1) for *Gaeumannomyces tritici* R3-111a-1; ABCG2 (EWM27479.1) for *Nannochloropsis gaditana*; ABCG2 (OAP09062.1) for *Arabidopsis thaliana*; ABCG2 (CCU81831.1) for *Blumeria graminis* f. sp. hordei DH14; ABCG2 (CEG64621.1) for *Rhizopus microsporus*; ABCG2 (OLQ08707.1) for *Symbiodinium microadriaticum*; ABCG2 (OLP84914.1) for *Symbiodinium microadriaticum*; ABCG2 (KJX95289.1) for *Zymoseptoria brevis*; ABCG2 (OHW95109.1) for *Colletotrichum incanum*; ABCG2 (XP\_003007046.1) for *Verticillium alfalfae* VaMs.102. ABCC1 (XP\_005537371.1) for *Cyanidioschyzon merolae* strain 10D.
